# Supplementary material
Source: PubMed Central journal article supplement (PMC7755247)
Supplement: AEM.02240-20-s0001.pdf [file AEM.02240-20-s0001.pdf]

1 **Dietary phytase and lactic acid treated cereals caused greater taxonomic than functional**  
2 **adaptations in the cecal metagenome of growing pigs**

3

4 Jutamat Klinsoda<sup>a,b</sup>, Julia Vötterl<sup>a</sup>, Simone Koger<sup>a</sup>, Barbara U. Metzler-Zebeli<sup>c</sup>#

5

6

7 <sup>a</sup> Institute of Animal Nutrition and Functional Plant Compounds, Department for Farm

8 Animals and Veterinary Public Health, University of Veterinary Medicine, Vienna, Austria

9 <sup>b</sup> Institute of Food Research and Product Development, University of Kasetsart, Bangkok,

10 Thailand

11 <sup>c</sup> Institute of Physiology, Pathophysiology and Biophysics, Division Nutritional Physiology,

12 Department of Biomedical Sciences, University of Veterinary Medicine, Vienna, Austria

13

14

15 Running title: Phosphorus and cecal metagenome

16 #Address correspondence to Barbara.Metzler@vetmeduni.ac.at

17

18 **KEYWORDS:** cecum, metagenome, lactic acid treatment of cereal grains, pig, phytase

19

## Glycolysis/Gluconeogenesis

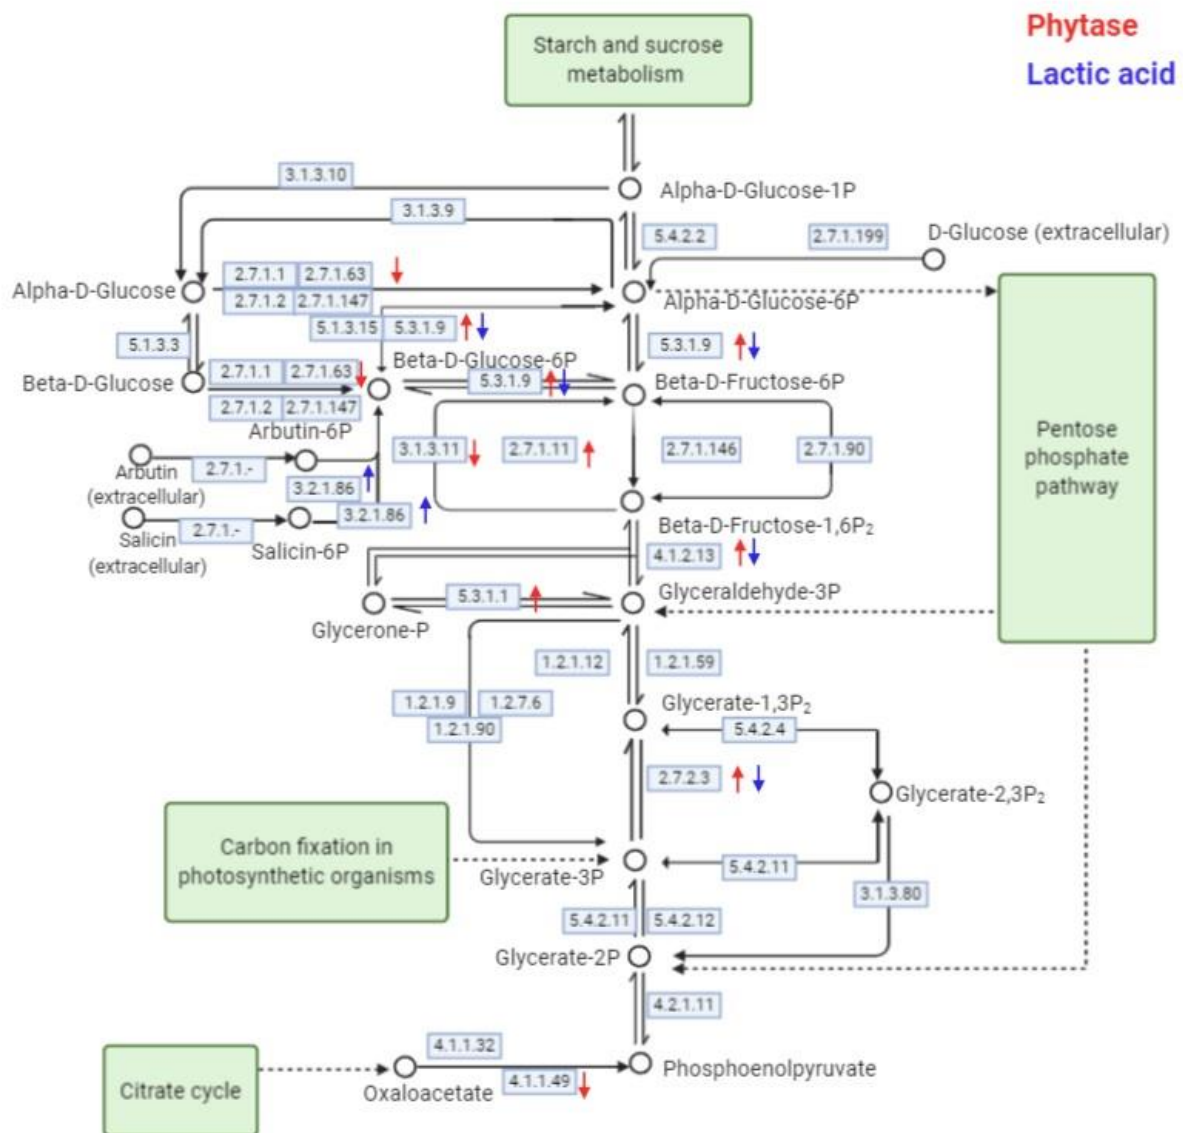

20

21 **FIG S1** Map of genes corresponding to the key enzymes related to KEGG orthology (KO)  
 22 functions within 'Glycolysis / Gluconeogenesis' in the metagenome of pigs fed diets with or  
 23 without phytase and lactic acid treatment of cereals. Arrows illustrate significant differences  
 24 and tendencies for differences in gene abundances due to phytase supplementation (red) and  
 25 lactic acid treatment of dietary cereals (blue). Detailed information on significant differences  
 26 and tendencies for differences can be found in Table S6.

27 **TABLE S1** Ingredient and chemical composition of experimental diets

| Treatment of cereal grains                         | No phytase |      | Phytase |      |
|----------------------------------------------------|------------|------|---------|------|
|                                                    | Con        | LA   | Con     | LA   |
| Ingredient (%)                                     |            |      |         |      |
| Wheat                                              | 36.2       | 36.2 | 36.2    | 36.2 |
| Corn                                               | 36.0       | 36.0 | 36.0    | 36.0 |
| Soybean HP dehulled                                | 22.0       | 22.0 | 22.0    | 22.0 |
| Sunflower oil                                      | 2.0        | 2.0  | 2.0     | 2.0  |
| Vitamin-mineral-premix <sup>a</sup>                | 2.3        | 2.3  | 2.3     | 2.3  |
| Limestone                                          | 1.1        | 1.1  | 1.1     | 1.1  |
| Monocalcium phosphate                              | 0.4        | 0.4  | 0.4     | 0.4  |
| Phytase (FTU/kg) <sup>b</sup>                      | 0          | 0    | 500     | 500  |
| Analyzed chemical composition<br>(g/kg dry matter) |            |      |         |      |
| Dry matter                                         | 900        | 942  | 900     | 942  |
| Crude ash                                          | 54         | 49   | 54      | 49   |
| Crude protein                                      | 213        | 202  | 216     | 205  |
| Neutral detergent fiber                            | 131        | 122  | 129     | 119  |
| Acid detergent fiber                               | 50         | 51   | 52      | 51   |
| Hemicellulose <sup>c</sup>                         | 81         | 71   | 77      | 68   |
| Resistant starch                                   | 8.2        | 7.7  | 9.2     | 8.3  |
| Non-resistant starch                               | 511        | 492  | 500     | 485  |
| Phosphorus                                         | 5.5        | 4.9  | 5.5     | 4.9  |
| Calcium                                            | 6.6        | 6.2  | 6.6     | 6.2  |

28 Con, control diet; LA, lactic acid. <sup>a</sup>The vitamin-mineral-premix provided per kilogram of  
 29 experimental diet (Garant GmbH, Pöchlarn, Austria): vitamin A, 17.250 IE; vitamin D3,  
 30 2.299 IE; vitamin E, 160.999 mg; vitamin K3, 4.600 mg; vitamin B1, 2.299 mg; vitamin B2,  
 31 6.900 mg; vitamin B6, 3.450 mg; vitamin B12, 0.034 mg; vitamin B3, 34.500 mg;  
 32 Pantothenic acid, 17.150 mg; Folic acid, 1.150 mg; Biotin, 0.172 mg; Choline Chloride,  
 33 579.600 mg; Fe, 103.500 mg; Cu, 17.250 mg; Zn, 103.500 mg; Mn, 45.999 mg; J, 1.725 mg;  
 34 Se, 0.517 mg.

35 <sup>b</sup>FTU; phytase units.

36 <sup>c</sup>calculated as the difference between neutral detergent fiber and acid detergent fiber.

37

38 **TABLE S2** Permutational multivariate analysis of variance (PERMANOVA) results for cecal  
 39 bacterial communities of pigs (amplicon sequence variants at relative abundance > 0.01% of  
 40 all reads) fed diets with or without phytase and lactic acid treatment of cereals

| Source of Variation   | df | SS   | R <sup>2</sup> | F     | P-value |
|-----------------------|----|------|----------------|-------|---------|
| Diet                  | 3  | 0.14 | 0.152          | 1.677 | 0.041   |
| Phytase               | 1  | 0.06 | 0.072          | 2.375 | 0.028   |
| Lactic acid           | 1  | 0.02 | 0.025          | 0.837 | 0.518   |
| Phytase : Lactic acid | 1  | 0.05 | 0.055          | 1.817 | 0.100   |
| Residual              | 28 | 0.75 | 0.848          |       |         |
| Total                 | 31 | 0.89 | 1.000          |       |         |

50 The analysis based on pairwise distance of a multivariate data set and values were obtained  
 51 using type III sums of squares with 999 permutations of residuals. Significant difference was  
 52 declared at  $P \leq 0.05$ . df, degrees of freedom; SS, sum of squares.

53 **TABLE S3** Bacterial genera (relative abundance > 0.1% of all reads) in cecal digesta of pigs fed diets with or without phytase and lactic acid  
 54 treatment of cereals

| Treatment of cereal grains | No phytase |         | Phytase |         | SEM   | <i>P</i> -value |       |            |
|----------------------------|------------|---------|---------|---------|-------|-----------------|-------|------------|
|                            | Con        | LA      | Con     | LA      |       | Phytase         | LA    | Phytase×LA |
| <i>Prevotella</i>          | 32.40      | 35.23   | 27.42   | 28.19   | 2.035 | 0.007           | 0.385 | 0.616      |
| <i>Bacteroides</i>         | 13.41      | 11.31   | 12.74   | 12.10   | 0.419 | 0.898           | 0.003 | 0.095      |
| <i>Clostridium</i>         | 7.83 ab    | 6.19 b  | 8.25 ab | 9.82 a  | 0.710 | 0.009           | 0.968 | 0.033      |
| <i>Lactobacillus</i>       | 6.42       | 8.56    | 8.84    | 8.00    | 1.272 | 0.471           | 0.613 | 0.254      |
| <i>Eubacterium</i>         | 4.49       | 4.55    | 5.57    | 5.14    | 0.438 | 0.068           | 0.680 | 0.575      |
| <i>Ruminococcus</i>        | 2.53       | 2.12    | 2.65    | 2.91    | 0.226 | 0.055           | 0.747 | 0.145      |
| <i>Faecalibacterium</i>    | 1.42       | 1.53    | 1.89    | 1.84    | 0.227 | 0.099           | 0.894 | 0.752      |
| <i>Mitsuokella</i>         | 1.44       | 2.33    | 1.13    | 1.41    | 0.180 | 0.002           | 0.003 | 0.103      |
| <i>Roseburia</i>           | 1.24       | 1.17    | 1.65    | 1.53    | 0.148 | 0.015           | 0.519 | 0.871      |
| <i>Selenomonas</i>         | 1.14       | 1.41    | 1.34    | 1.18    | 0.135 | 0.904           | 0.687 | 0.124      |
| <i>Parabacteroides</i>     | 1.36       | 1.02    | 1.36    | 1.29    | 0.075 | 0.083           | 0.011 | 0.088      |
| <i>Subdoligranulum</i>     | 0.95       | 0.93    | 1.25    | 1.15    | 0.110 | 0.027           | 0.588 | 0.678      |
| <i>Butyrivibrio</i>        | 0.90       | 0.75    | 1.20    | 1.03    | 0.138 | 0.051           | 0.257 | 0.931      |
| <i>Bacillus</i>            | 0.763      | 0.728   | 0.856   | 0.917   | 0.041 | 0.002           | 0.756 | 0.260      |
| <i>Acidaminococcus</i>     | 0.772      | 0.922   | 0.707   | 0.714   | 0.044 | 0.005           | 0.086 | 0.119      |
| <i>Streptococcus</i>       | 0.701      | 0.456   | 0.802   | 0.534   | 0.108 | 0.413           | 0.025 | 0.916      |
| <i>Megasphaera</i>         | 0.464      | 0.811   | 0.408   | 0.461   | 0.108 | 0.071           | 0.075 | 0.184      |
| <i>Campylobacter</i>       | 0.626      | 0.777   | 0.510   | 0.207   | 0.155 | 0.037           | 0.631 | 0.156      |
| <i>Coprococcus</i>         | 0.510      | 0.426   | 0.517   | 0.510   | 0.048 | 0.351           | 0.356 | 0.430      |
| <i>Veillonella</i>         | 0.447 b    | 0.619 a | 0.435 b | 0.458 b | 0.030 | 0.007           | 0.003 | 0.019      |
| <i>Dorea</i>               | 0.466      | 0.435   | 0.504   | 0.506   | 0.030 | 0.077           | 0.635 | 0.586      |
| <i>Porphyromonas</i>       | 0.500      | 0.364   | 0.493   | 0.439   | 0.024 | 0.174           | 0.001 | 0.100      |

|                                   |       |       |       |       |       |       |       |       |
|-----------------------------------|-------|-------|-------|-------|-------|-------|-------|-------|
| <i>Bifidobacterium</i>            | 0.402 | 0.439 | 0.464 | 0.354 | 0.074 | 0.878 | 0.633 | 0.330 |
| <i>Blautia</i>                    | 0.392 | 0.300 | 0.493 | 0.443 | 0.052 | 0.028 | 0.183 | 0.694 |
| <i>Dialister</i>                  | 0.330 | 0.696 | 0.200 | 0.401 | 0.062 | 0.002 | 0.000 | 0.194 |
| Unclassified                      | 0.374 | 0.340 | 0.416 | 0.467 | 0.029 | 0.008 | 0.780 | 0.158 |
| <i>Erysipelotrichaceae</i>        |       |       |       |       |       |       |       |       |
| Unclassified                      | 0.384 | 0.294 | 0.457 | 0.455 | 0.043 | 0.012 | 0.299 | 0.321 |
| <i>Lachnospiraceae</i>            |       |       |       |       |       |       |       |       |
| <i>Desulfitobacterium</i>         | 0.345 | 0.324 | 0.377 | 0.377 | 0.019 | 0.033 | 0.594 | 0.576 |
| <i>Alkaliphilus</i>               | 0.329 | 0.289 | 0.358 | 0.381 | 0.021 | 0.008 | 0.687 | 0.144 |
| Unclassified                      | 0.357 | 0.219 | 0.371 | 0.362 | 0.033 | 0.025 | 0.037 | 0.064 |
| <i>Ruminococcaceae</i>            |       |       |       |       |       |       |       |       |
| <i>Ethanoligenens</i>             | 0.313 | 0.259 | 0.341 | 0.340 | 0.025 | 0.035 | 0.267 | 0.287 |
| <i>Holdemania</i>                 | 0.260 | 0.242 | 0.307 | 0.341 | 0.019 | 0.001 | 0.673 | 0.191 |
| <i>Paludibacter</i>               | 0.288 | 0.225 | 0.285 | 0.262 | 0.013 | 0.208 | 0.003 | 0.135 |
| <i>Desulfotomaculum</i>           | 0.251 | 0.260 | 0.276 | 0.267 | 0.013 | 0.212 | 0.969 | 0.488 |
| Unclassified <i>Clostridiales</i> | 0.260 | 0.204 | 0.288 | 0.285 | 0.020 | 0.011 | 0.149 | 0.190 |
| <i>Fusobacterium</i>              | 0.240 | 0.215 | 0.258 | 0.260 | 0.012 | 0.012 | 0.341 | 0.264 |
| <i>Treponema</i>                  | 0.230 | 0.097 | 0.255 | 0.381 | 0.091 | 0.102 | 0.970 | 0.168 |
| <i>Caldicellulosiruptor</i>       | 0.223 | 0.198 | 0.256 | 0.256 | 0.014 | 0.004 | 0.398 | 0.405 |
| <i>Paenibacillus</i>              | 0.209 | 0.192 | 0.235 | 0.243 | 0.014 | 0.012 | 0.733 | 0.383 |
| <i>Enterococcus</i>               | 0.203 | 0.191 | 0.228 | 0.242 | 0.012 | 0.003 | 0.961 | 0.293 |
| <i>Geobacillus</i>                | 0.184 | 0.183 | 0.203 | 0.220 | 0.009 | 0.005 | 0.396 | 0.330 |
| <i>Fibrobacter</i>                | 0.213 | 0.173 | 0.208 | 0.195 | 0.011 | 0.435 | 0.025 | 0.254 |
| <i>Flavobacterium</i>             | 0.208 | 0.178 | 0.197 | 0.187 | 0.007 | 0.905 | 0.006 | 0.132 |
| <i>Desulfovibrio</i>              | 0.205 | 0.182 | 0.194 | 0.183 | 0.016 | 0.756 | 0.304 | 0.717 |
| <i>Oribacterium</i>               | 0.164 | 0.184 | 0.174 | 0.206 | 0.014 | 0.278 | 0.077 | 0.666 |
| <i>Slackia</i>                    | 0.173 | 0.156 | 0.185 | 0.188 | 0.010 | 0.043 | 0.521 | 0.341 |

|                           |         |         |         |         |       |       |       |       |
|---------------------------|---------|---------|---------|---------|-------|-------|-------|-------|
| <i>Geobacter</i>          | 0.168   | 0.164   | 0.179   | 0.176   | 0.009 | 0.203 | 0.656 | 0.949 |
| <i>Caldanaerobacter</i>   | 0.159   | 0.153   | 0.181   | 0.185   | 0.009 | 0.004 | 0.954 | 0.581 |
| <i>Thermoanaerobacter</i> | 0.154   | 0.145   | 0.174   | 0.180   | 0.008 | 0.003 | 0.878 | 0.372 |
| <i>Catenibacterium</i>    | 0.104   | 0.150   | 0.101   | 0.224   | 0.033 | 0.287 | 0.017 | 0.254 |
| <i>Anaerotruncus</i>      | 0.156   | 0.101   | 0.153   | 0.154   | 0.015 | 0.100 | 0.086 | 0.074 |
| <i>Atopobium</i>          | 0.127   | 0.148   | 0.118   | 0.156   | 0.014 | 0.997 | 0.043 | 0.536 |
| <i>Brachyspira</i>        | 0.134   | 0.124   | 0.139   | 0.145   | 0.008 | 0.094 | 0.796 | 0.311 |
| <i>Eggerthella</i>        | 0.128   | 0.120   | 0.136   | 0.143   | 0.007 | 0.039 | 0.955 | 0.326 |
| <i>Abiotrophia</i>        | 0.124   | 0.102   | 0.145   | 0.139   | 0.012 | 0.029 | 0.265 | 0.518 |
| <i>Alistipes</i>          | 0.144   | 0.101   | 0.142   | 0.120   | 0.008 | 0.317 | 0.001 | 0.228 |
| <i>Heliobacterium</i>     | 0.120   | 0.129   | 0.127   | 0.123   | 0.006 | 0.893 | 0.711 | 0.341 |
| <i>Helicobacter</i>       | 0.148   | 0.166   | 0.114   | 0.071   | 0.023 | 0.011 | 0.601 | 0.201 |
| <i>Shewanella</i>         | 0.148   | 0.123   | 0.116   | 0.110   | 0.009 | 0.020 | 0.096 | 0.305 |
| <i>Pedobacter</i>         | 0.131   | 0.105   | 0.129   | 0.117   | 0.005 | 0.325 | 0.001 | 0.191 |
| <i>Listeria</i>           | 0.110   | 0.109   | 0.124   | 0.132   | 0.005 | 0.001 | 0.524 | 0.403 |
| <i>Anaerostipes</i>       | 0.119   | 0.089   | 0.130   | 0.131   | 0.014 | 0.070 | 0.317 | 0.278 |
| <i>Staphylococcus</i>     | 0.105   | 0.103   | 0.122   | 0.132   | 0.006 | 0.001 | 0.517 | 0.311 |
| <i>Carboxydotherrmus</i>  | 0.107   | 0.114   | 0.117   | 0.119   | 0.005 | 0.150 | 0.349 | 0.607 |
| <i>Pelotomaculum</i>      | 0.107   | 0.117   | 0.114   | 0.114   | 0.005 | 0.660 | 0.311 | 0.306 |
| <i>Thermosinus</i>        | 0.108   | 0.103   | 0.129   | 0.106   | 0.010 | 0.250 | 0.178 | 0.391 |
| <i>Collinsella</i>        | 0.098   | 0.135   | 0.085   | 0.125   | 0.012 | 0.356 | 0.004 | 0.893 |
| <i>Vibrio</i>             | 0.132   | 0.107   | 0.097   | 0.089   | 0.010 | 0.016 | 0.130 | 0.399 |
| <i>Syntrophomonas</i>     | 0.098   | 0.094   | 0.112   | 0.108   | 0.005 | 0.014 | 0.473 | 0.990 |
| <i>Capnocytophaga</i>     | 0.109 a | 0.088 b | 0.106 a | 0.104 a | 0.004 | 0.150 | 0.011 | 0.038 |
| <i>Pseudomonas</i>        | 0.117   | 0.097   | 0.097   | 0.091   | 0.005 | 0.021 | 0.024 | 0.227 |
| <i>Moorella</i>           | 0.092   | 0.098   | 0.100   | 0.100   | 0.004 | 0.285 | 0.490 | 0.488 |

|                     |       |       |       |       |       |       |       |       |
|---------------------|-------|-------|-------|-------|-------|-------|-------|-------|
| <i>Spirosoma</i>    | 0.105 | 0.090 | 0.099 | 0.095 | 0.003 | 0.792 | 0.009 | 0.129 |
| <i>Anaerococcus</i> | 0.093 | 0.082 | 0.103 | 0.108 | 0.005 | 0.001 | 0.487 | 0.109 |

55 Sequence data were submitted for bioinformatic analysis at MG RAST (www.mg-rast.org) before April 2020 when the family *Lactobacillaceae* was  
56 reclassified (1). Therefore, the genus name *Lactobacillus* presented here includes the new genera *Lactobacillus*, *Lacticaseibacillus*,  
57 *Lactiplantibacillus*, *Levilactobacillus*, *Ligilactobacillus* and *Limosilactobacillus*. Values are presented as least square means  $\pm$  SEM (n = 8 pigs per  
58 dietary treatment). <sup>a,b</sup> Different superscripts within a row indicate significant difference ( $P \leq 0.05$ ). Con, control; LA, lactic acid-treated cereals.

59

## 60 Reference

- 61 1. **Zheng J, Wittouck S, Salvetti E, Franz CMAP, Harris HMB, Mattarelli P, O'Toole PW, Pot B, Vandamme P, Walter J, Watanabe**  
62 **K, Wuyts S, Felis GE, Gänzle MG, Lebeer S.** 2020. A taxonomic note on the genus *Lactobacillus*: Description of 23 novel genera,  
63 emended description of the genus *Lactobacillus* Beijerinck 1901, and union of *Lactobacillaceae* and *Leuconostocaceae*. *Int J Syst Evol*  
64 *Microbiol.* 70(4):2782-2858. doi:10.1099/ijsem.0.004107



65 **TABLE S4** Bacterial abundances at amplicon sequence variant (ASV) level in cecal digesta of pigs fed diets with or without phytase and  
 66 lactic acid treatment of cereals

| Treatment of cereal grains                      | No phytase |        | Phytase |        | SEM   | <i>P</i> -value |       |              |
|-------------------------------------------------|------------|--------|---------|--------|-------|-----------------|-------|--------------|
|                                                 | Control    | LA     | Control | LA     |       | Phytase         | LA    | Phytase x LA |
| <i>Prevotella copri</i>                         | 10.11      | 13.67  | 7.92    | 8.62   | 1.148 | 0.004           | 0.075 | 0.225        |
| <i>Prevotella ruminicola</i>                    | 6.19       | 5.66   | 5.44    | 5.21   | 0.303 | 0.057           | 0.221 | 0.620        |
| <i>Prevotella melaninogenica</i>                | 4.52       | 5.17   | 3.75    | 3.98   | 0.321 | 0.005           | 0.180 | 0.520        |
| <i>Eubacterium rectale</i>                      | 2.37       | 2.76   | 3.12    | 2.80   | 0.280 | 0.167           | 0.896 | 0.215        |
| <i>Lactobacillus johnsonii</i>                  | 1.58       | 2.06   | 0.98    | 2.15   | 0.652 | 0.700           | 0.218 | 0.601        |
| <i>Faecalibacterium prausnitzii</i>             | 1.42       | 1.53   | 1.89    | 1.84   | 0.227 | 0.099           | 0.894 | 0.752        |
| <i>Mitsuokella multacida</i>                    | 1.44       | 2.33   | 1.13    | 1.41   | 0.180 | 0.002           | 0.003 | 0.103        |
| <i>Prevotella buccae</i>                        | 1.67       | 1.62   | 1.45    | 1.49   | 0.093 | 0.074           | 0.997 | 0.605        |
| <i>Bacteroides vulgatus</i>                     | 1.66       | 1.50   | 1.53    | 1.47   | 0.064 | 0.216           | 0.101 | 0.422        |
| <i>Bacteroides fragilis</i>                     | 1.61       | 1.40   | 1.50    | 1.42   | 0.057 | 0.464           | 0.017 | 0.284        |
| <i>Lactobacillus acidophilus</i>                | 0.98       | 1.23   | 1.84    | 0.99   | 0.353 | 0.380           | 0.404 | 0.133        |
| <i>Lactobacillus amylovorus</i>                 | 0.98       | 1.22   | 1.87    | 0.93   | 0.364 | 0.420           | 0.347 | 0.116        |
| <i>Prevotella oris</i>                          | 1.19       | 1.16   | 1.03    | 1.08   | 0.065 | 0.082           | 0.846 | 0.603        |
| <i>Prevotella bryantii</i>                      | 1.11       | 1.05   | 0.98    | 1.02   | 0.054 | 0.137           | 0.784 | 0.376        |
| <i>Bacteroides thetaiotaomicron</i>             | 1.11       | 1.01   | 1.01    | 0.98   | 0.041 | 0.120           | 0.139 | 0.339        |
| <i>Eubacterium eligens</i>                      | 0.98       | 0.84   | 1.19    | 1.06   | 0.098 | 0.037           | 0.187 | 0.998        |
| <i>Bacteroides sp. 1_1_6</i>                    | 1.11 a     | 0.91 b | 1.01 a  | 0.99 b | 0.044 | 0.813           | 0.018 | 0.044        |
| <i>Limosilactobacillus reuteri</i> <sup>c</sup> | 0.61       | 1.19   | 0.95    | 1.22   | 0.253 | 0.463           | 0.110 | 0.539        |
| <i>Bacteroides sp. 4_3_47FAA</i>                | 1.02       | 0.88   | 0.97    | 0.89   | 0.039 | 0.532           | 0.008 | 0.402        |
| <i>Prevotella bergensis</i>                     | 0.94       | 1.04   | 0.84    | 0.90   | 0.059 | 0.046           | 0.209 | 0.708        |
| <i>Clostridium phytofermentans</i>              | 0.80       | 0.62   | 0.91    | 0.88   | 0.083 | 0.033           | 0.204 | 0.365        |
| <i>Prevotella tanneriae</i>                     | 0.88       | 0.72   | 0.84    | 0.74   | 0.074 | 0.875           | 0.084 | 0.681        |
| <i>Roseburia inulinivorans</i>                  | 0.63       | 0.60   | 0.87    | 0.80   | 0.086 | 0.018           | 0.586 | 0.802        |
| <i>Clostridium saccharolyticum</i>              | 0.71       | 0.57   | 0.79    | 0.79   | 0.057 | 0.014           | 0.261 | 0.213        |
| <i>Ruminococcus albus</i>                       | 0.75       | 0.54   | 0.76    | 0.73   | 0.067 | 0.147           | 0.093 | 0.197        |
| <i>Prevotella buccalis</i>                      | 0.74       | 0.66   | 0.67    | 0.68   | 0.035 | 0.417           | 0.300 | 0.211        |

|                                      |        |        |        |        |       |       |       |       |
|--------------------------------------|--------|--------|--------|--------|-------|-------|-------|-------|
| <i>Ruminococcus sp. 5_1_39BFAA</i>   | 0.59   | 0.62   | 0.62   | 0.87   | 0.068 | 0.055 | 0.055 | 0.119 |
| <i>Roseburia intestinalis</i>        | 0.61   | 0.56   | 0.78   | 0.73   | 0.065 | 0.016 | 0.457 | 0.971 |
| <i>Parabacteroides distasonis</i>    | 0.68   | 0.55   | 0.68   | 0.65   | 0.032 | 0.134 | 0.018 | 0.092 |
| <i>Prevotella timonensis</i>         | 0.67   | 0.61   | 0.61   | 0.62   | 0.031 | 0.399 | 0.410 | 0.242 |
| <i>Clostridium botulinum</i>         | 0.58 b | 0.45 b | 0.59 b | 0.81 a | 0.071 | 0.017 | 0.500 | 0.022 |
| <i>Clostridium difficile</i>         | 0.57 b | 0.44 b | 0.50 b | 0.91 a | 0.101 | 0.060 | 0.164 | 0.013 |
| <i>Prevotella oralis</i>             | 0.64   | 0.58   | 0.58   | 0.59   | 0.033 | 0.395 | 0.399 | 0.297 |
| <i>Selenomonas sputigena</i>         | 0.53   | 0.64   | 0.65   | 0.55   | 0.071 | 0.852 | 0.991 | 0.160 |
| <i>Prevotella sp. oral taxon 317</i> | 0.58   | 0.49   | 0.53   | 0.51   | 0.026 | 0.636 | 0.047 | 0.189 |
| <i>Prevotella veroralis</i>          | 0.55   | 0.56   | 0.45   | 0.48   | 0.038 | 0.031 | 0.658 | 0.762 |
| <i>Prevotella marshii</i>            | 0.56   | 0.43   | 0.54   | 0.50   | 0.025 | 0.408 | 0.003 | 0.077 |
| <i>Prevotella sp. oral taxon 472</i> | 0.54   | 0.46   | 0.51   | 0.48   | 0.023 | 0.804 | 0.024 | 0.220 |
| <i>Lactobacillus helveticus</i>      | 0.38   | 0.47   | 0.70   | 0.39   | 0.133 | 0.393 | 0.423 | 0.145 |
| <i>Clostridium beijerinckii</i>      | 0.45 b | 0.35 b | 0.45 b | 0.64 a | 0.058 | 0.019 | 0.408 | 0.023 |
| <i>Bacteroides capillosus</i>        | 0.51   | 0.33   | 0.53   | 0.53   | 0.047 | 0.034 | 0.059 | 0.062 |
| <i>Lactobacillus crispatus</i>       | 0.33   | 0.42   | 0.60   | 0.47   | 0.130 | 0.246 | 0.888 | 0.412 |
| <i>Ruminococcus obeum</i>            | 0.43   | 0.39   | 0.43   | 0.56   | 0.049 | 0.085 | 0.373 | 0.101 |
| <i>Lactobacillus gasseri</i>         | 0.39   | 0.51   | 0.31   | 0.53   | 0.127 | 0.794 | 0.186 | 0.686 |
| <i>Clostridium thermocellum</i>      | 0.42   | 0.36   | 0.47   | 0.47   | 0.030 | 0.008 | 0.338 | 0.334 |
| <i>Bacteroides dorei</i>             | 0.48   | 0.39   | 0.44   | 0.41   | 0.017 | 0.627 | 0.003 | 0.101 |
| <i>Prevotella bivia</i>              | 0.46   | 0.44   | 0.40   | 0.41   | 0.024 | 0.059 | 0.983 | 0.545 |
| <i>Lactobacillus ultunensis</i>      | 0.32   | 0.40   | 0.63   | 0.31   | 0.123 | 0.405 | 0.344 | 0.113 |
| <i>Bacteroides plebeius</i>          | 0.45   | 0.35   | 0.46   | 0.40   | 0.019 | 0.150 | 0.001 | 0.290 |
| <i>Bacteroides ovatus</i>            | 0.43   | 0.39   | 0.39   | 0.40   | 0.018 | 0.430 | 0.378 | 0.132 |
| <i>Clostridium perfringens</i>       | 0.39 b | 0.28 b | 0.37 b | 0.54 a | 0.056 | 0.053 | 0.573 | 0.024 |
| <i>Prevotella disiens</i>            | 0.44   | 0.39   | 0.36   | 0.37   | 0.025 | 0.049 | 0.553 | 0.312 |
| <i>Bacteroides sp. 2_1_16</i>        | 0.42   | 0.36   | 0.40   | 0.37   | 0.016 | 0.838 | 0.010 | 0.549 |
| <i>Bacteroides coprocola</i>         | 0.42   | 0.33   | 0.42   | 0.37   | 0.020 | 0.412 | 0.002 | 0.289 |
| <i>Prevotella sp. oral taxon 299</i> | 0.42   | 0.34   | 0.39   | 0.38   | 0.018 | 0.837 | 0.016 | 0.129 |
| <i>Bacteroides sp. 20_3</i>          | 0.36   | 0.26   | 0.37   | 0.35   | 0.026 | 0.081 | 0.021 | 0.124 |
| <i>Lactobacillus delbrueckii</i>     | 0.28   | 0.35   | 0.25   | 0.36   | 0.099 | 0.939 | 0.399 | 0.811 |
| <i>Eubacterium hallii</i>            | 0.32   | 0.28   | 0.33   | 0.30   | 0.028 | 0.622 | 0.214 | 0.826 |
| <i>Bacteroides coprophilus</i>       | 0.32   | 0.26   | 0.31   | 0.28   | 0.013 | 0.471 | 0.002 | 0.152 |

|                                     |         |         |         |         |       |       |       |       |
|-------------------------------------|---------|---------|---------|---------|-------|-------|-------|-------|
| <i>Bacteroides pectinophilus</i>    | 0.26    | 0.26    | 0.33    | 0.29    | 0.025 | 0.053 | 0.492 | 0.391 |
| <i>Parabacteroides sp. D13</i>      | 0.30    | 0.23    | 0.30    | 0.29    | 0.020 | 0.134 | 0.032 | 0.108 |
| <i>Bacteroides cellulosilyticus</i> | 0.28    | 0.24    | 0.28    | 0.26    | 0.011 | 0.329 | 0.015 | 0.246 |
| <i>Clostridium bartlettii</i>       | 0.23 b  | 0.17 b  | 0.19 b  | 0.42 a  | 0.054 | 0.057 | 0.128 | 0.010 |
| <i>Clostridium nexile</i>           | 0.239   | 0.196   | 0.283   | 0.268   | 0.024 | 0.022 | 0.239 | 0.558 |
| <i>Eubacterium limosum</i>          | 0.230   | 0.196   | 0.254   | 0.262   | 0.016 | 0.011 | 0.436 | 0.222 |
| <i>Clostridium sp. M62/1</i>        | 0.237   | 0.191   | 0.262   | 0.249   | 0.019 | 0.035 | 0.123 | 0.393 |
| <i>Ruminococcus flavefaciens</i>    | 0.285   | 0.167   | 0.256   | 0.231   | 0.031 | 0.574 | 0.030 | 0.144 |
| <i>Clostridium kluyveri</i>         | 0.219   | 0.201   | 0.242   | 0.259   | 0.014 | 0.010 | 0.965 | 0.231 |
| <i>Bacteroides stercoris</i>        | 0.246   | 0.210   | 0.234   | 0.224   | 0.010 | 0.921 | 0.034 | 0.202 |
| <i>Clostridium acetobutylicum</i>   | 0.214   | 0.196   | 0.233   | 0.261   | 0.015 | 0.008 | 0.741 | 0.133 |
| <i>Bacteroides intestinalis</i>     | 0.247 a | 0.192 b | 0.236 a | 0.221 a | 0.010 | 0.379 | 0.002 | 0.047 |
| <i>Clostridium cellulolyticum</i>   | 0.212   | 0.178   | 0.239   | 0.242   | 0.016 | 0.008 | 0.329 | 0.251 |
| <i>Selenomonas flueggei</i>         | 0.191   | 0.247   | 0.217   | 0.200   | 0.020 | 0.605 | 0.354 | 0.083 |
| <i>Bacteroides uniformis</i>        | 0.230   | 0.186   | 0.223   | 0.209   | 0.010 | 0.423 | 0.006 | 0.118 |
| <i>Clostridium sp. L2-50</i>        | 0.211   | 0.185   | 0.225   | 0.209   | 0.022 | 0.403 | 0.346 | 0.824 |
| <i>Clostridium leptum</i>           | 0.204   | 0.173   | 0.205   | 0.216   | 0.023 | 0.358 | 0.673 | 0.366 |
| <i>Selenomonas noxia</i>            | 0.179   | 0.226   | 0.205   | 0.187   | 0.020 | 0.730 | 0.475 | 0.112 |
| <i>Ruminococcus lactaris</i>        | 0.191   | 0.167   | 0.228   | 0.208   | 0.018 | 0.040 | 0.241 | 0.916 |
| <i>Clostridium bolteae</i>          | 0.203   | 0.153   | 0.221   | 0.216   | 0.016 | 0.017 | 0.098 | 0.166 |
| <i>Bacteroides sp. 2_1_7</i>        | 0.212 a | 0.160 b | 0.201 a | 0.199 a | 0.011 | 0.250 | 0.028 | 0.037 |
| <i>Clostridium hathewayi</i>        | 0.193   | 0.141   | 0.224   | 0.209   | 0.018 | 0.012 | 0.078 | 0.312 |
| <i>Eubacterium siraeum</i>          | 0.188   | 0.118   | 0.206   | 0.240   | 0.043 | 0.118 | 0.682 | 0.247 |
| <i>Clostridium scindens</i>         | 0.188   | 0.144   | 0.207   | 0.206   | 0.018 | 0.030 | 0.205 | 0.230 |
| <i>Clostridium asparagiforme</i>    | 0.188   | 0.140   | 0.210   | 0.202   | 0.015 | 0.010 | 0.075 | 0.199 |
| <i>Ruminococcus gnavus</i>          | 0.177   | 0.146   | 0.213   | 0.194   | 0.020 | 0.049 | 0.237 | 0.796 |
| <i>Bacteroides eggerthii</i>        | 0.199   | 0.151   | 0.197   | 0.181   | 0.010 | 0.176 | 0.004 | 0.121 |
| <i>Bacteroides sp. D2</i>           | 0.193   | 0.169   | 0.184   | 0.179   | 0.008 | 0.940 | 0.059 | 0.225 |
| <i>Clostridium cellulovorans</i>    | 0.174   | 0.148   | 0.191   | 0.209   | 0.015 | 0.013 | 0.806 | 0.142 |
| <i>Clostridium sp. SS2/1</i>        | 0.174   | 0.134   | 0.184   | 0.198   | 0.018 | 0.050 | 0.464 | 0.137 |
| <i>Parabacteroides merdae</i>       | 0.187   | 0.124   | 0.193   | 0.174   | 0.012 | 0.031 | 0.003 | 0.092 |
| <i>Parabacteroides johnsonii</i>    | 0.186   | 0.123   | 0.190   | 0.174   | 0.013 | 0.043 | 0.006 | 0.082 |
| <i>Bacteroides sp. 2_2_4</i>        | 0.176   | 0.150   | 0.170   | 0.166   | 0.007 | 0.467 | 0.027 | 0.118 |

|                                       |         |         |         |         |       |       |       |       |
|---------------------------------------|---------|---------|---------|---------|-------|-------|-------|-------|
| <i>Eubacterium ventriosum</i>         | 0.158   | 0.129   | 0.185   | 0.177   | 0.017 | 0.041 | 0.293 | 0.545 |
| <i>Bacteroides finegoldii</i>         | 0.177   | 0.150   | 0.161   | 0.161   | 0.007 | 0.719 | 0.087 | 0.076 |
| <i>Clostridium novyi</i>              | 0.152   | 0.137   | 0.166   | 0.190   | 0.011 | 0.007 | 0.688 | 0.100 |
| <i>Prevotella amnii</i>               | 0.178   | 0.166   | 0.149   | 0.143   | 0.009 | 0.009 | 0.362 | 0.736 |
| <i>Bacteroides sp. D20</i>            | 0.166   | 0.135   | 0.161   | 0.151   | 0.006 | 0.436 | 0.004 | 0.117 |
| <i>Eubacterium cellulosolvens</i>     | 0.138   | 0.131   | 0.152   | 0.172   | 0.017 | 0.120 | 0.704 | 0.427 |
| <i>Clostridium sp. 7_2_43FAA</i>      | 0.126 b | 0.078 b | 0.112 b | 0.264 a | 0.047 | 0.077 | 0.276 | 0.041 |
| <i>Selenomonas sp. oral taxon 137</i> | 0.126   | 0.160   | 0.146   | 0.132   | 0.013 | 0.758 | 0.453 | 0.092 |

67 Values are presented as least square means  $\pm$  SEM (n = 8 pigs per dietary treatment). <sup>a,b</sup> Different superscripts within a row indicate  
68 significant difference ( $P \leq 0.05$ ). Con, control; LA, lactic acid-treated cereals. <sup>c</sup> Due to the reclassification of the family *Lactobacillaceae*  
69 (1), *Lactobacillus reuteri* was reclassified as *Limosilactobacillus reuteri*.

70

71

72 **TABLE S5** Permutational multivariate analysis of variance (PERMANOVA) results for KEGG  
 73 orthology (KO) functions (relative abundance > 0.01% of all reads) in cecal digesta of pigs fed  
 74 diets with or without phytase and lactic acid treatment of cereals

| Source of Variation   | df | SS    | R <sup>2</sup> | F     | <i>P</i> -value     |
|-----------------------|----|-------|----------------|-------|---------------------|
| Diet                  | 3  | 0.008 | 0.099          | 1.036 | 0.411 <sup>76</sup> |
| Phytase               | 1  | 0.002 | 0.030          | 0.941 | 0.459 <sup>77</sup> |
| Lactic acid           | 1  | 0.004 | 0.049          | 1.509 | 0.156 <sup>78</sup> |
| Phytase : Lactic acid | 1  | 0.002 | 0.021          | 0.659 | 0.679 <sup>80</sup> |
| Residual              | 28 | 0.073 | 0.900          |       | 81                  |
| Total                 | 31 | 0.081 | 1.000          |       | 82                  |

84 The analysis based on pairwise distance of a multivariate data set and values were obtained using  
 85 type III sums of squares with 999 permutations of residuals. Significant difference was declared  
 86 at  $P \leq 0.05$ . df, degrees of freedom; SS, sum of squares.

87 **TABLE S6** KEGG orthology (KO) functions related to ‘carbohydrate metabolism’ pathways in cecal digesta of pigs fed diets with or  
 88 without phytase and lactic acid treatment of cereals

| Treatment of grains                                                          | No phytase |        | Phytase |        | SEM    | <i>P</i> -value |       |              |
|------------------------------------------------------------------------------|------------|--------|---------|--------|--------|-----------------|-------|--------------|
|                                                                              | CON        | LA     | CON     | LA     |        | Phytase         | LA    | Phytase × LA |
| <b>00010 Glycolysis / Gluconeogenesis [PATH:ko00010]</b>                     |            |        |         |        |        |                 |       |              |
| E4.1.1.49, pckA; phosphoenolpyruvate carboxykinase (ATP) [EC:4.1.1.49]       | 0.33       | 0.33   | 0.31    | 0.31   | 0.0086 | 0.061           | 0.873 | 0.864        |
| PGK, pgk; phosphoglycerate kinase [EC:2.7.2.3]                               | 0.27       | 0.26   | 0.27    | 0.27   | 0.0031 | 0.052           | 0.048 | 0.924        |
| GPI, pgi; glucose-6-phosphate isomerase [EC:5.3.1.9]                         | 0.24       | 0.23   | 0.24    | 0.24   | 0.0042 | 0.076           | 0.100 | 0.170        |
| pfkA, PFK; 6-phosphofructokinase 1 [EC:2.7.1.11]                             | 0.23       | 0.21   | 0.25    | 0.26   | 0.0091 | 0.004           | 0.439 | 0.175        |
| E3.2.1.86B, bglA; 6-phospho-beta-glucosidase [EC:3.2.1.86]                   | 0.16       | 0.22   | 0.21    | 0.21   | 0.0190 | 0.235           | 0.097 | 0.197        |
| FBA, fbaA; fructose-bisphosphate aldolase, class II [EC:4.1.2.13]            | 0.18       | 0.17   | 0.18    | 0.18   | 0.0039 | 0.054           | 0.097 | 0.307        |
| fbp3; fructose-1,6-bisphosphatase III [EC:3.1.3.11]                          | 0.16       | 0.16   | 0.16    | 0.16   | 0.0047 | 0.948           | 0.792 | 0.696        |
| E5.1.3.3, galM; aldose 1-epimerase [EC:5.1.3.3]                              | 0.15       | 0.16   | 0.16    | 0.16   | 0.0037 | 0.783           | 0.881 | 0.667        |
| TPI, tpiA; triosephosphate isomerase (TIM) [EC:5.3.1.1]                      | 0.12       | 0.12   | 0.13    | 0.13   | 0.0040 | 0.006           | 0.333 | 0.861        |
| ACSS, acs; acetyl-CoA synthetase [EC:6.2.1.1]                                | 0.12       | 0.11   | 0.10    | 0.11   | 0.0054 | 0.062           | 0.918 | 0.236        |
| porA; pyruvate ferredoxin oxidoreductase, alpha subunit [EC:1.2.7.1]         | 0.032      | 0.022  | 0.035   | 0.032  | 0.0036 | 0.091           | 0.116 | 0.360        |
| porB; pyruvate ferredoxin oxidoreductase, beta subunit [EC:1.2.7.1]          | 0.026      | 0.018  | 0.026   | 0.025  | 0.0027 | 0.254           | 0.094 | 0.182        |
| glpX; fructose-1,6-bisphosphatase II [EC:3.1.3.11]                           | 0.015      | 0.017  | 0.011   | 0.013  | 0.0014 | 0.009           | 0.129 | 0.928        |
| porG; pyruvate ferredoxin oxidoreductase, gamma subunit [EC:1.2.7.1]         | 0.012      | 0.008  | 0.014   | 0.013  | 0.0015 | 0.030           | 0.096 | 0.322        |
| E1.2.7.5, aor; aldehyde:ferredoxin oxidoreductase [EC:1.2.7.5]               | 0.0086     | 0.0050 | 0.0094  | 0.0083 | 0.0014 | 0.155           | 0.105 | 0.378        |
| E3.2.1.86A, celF; 6-phospho-beta-glucosidase [EC:3.2.1.86]                   | 0.0046     | 0.0035 | 0.0043  | 0.0051 | 0.0005 | 0.217           | 0.802 | 0.085        |
| FBP, fbp; fructose-1,6-bisphosphatase I [EC:3.1.3.11]                        | 0.0048     | 0.0043 | 0.0028  | 0.0012 | 0.0007 | 0.001           | 0.162 | 0.467        |
| porD; pyruvate ferredoxin oxidoreductase, delta subunit [EC:1.2.7.1]         | 0.0026     | 0.0025 | 0.0032  | 0.0028 | 0.0003 | 0.087           | 0.382 | 0.559        |
| agp; glucose-1-phosphatase [EC:3.1.3.10]                                     | 0.0021     | 0.0027 | 0.0026  | 0.0029 | 0.0004 | 0.318           | 0.246 | 0.712        |
| E1.1.1.2, adh; alcohol dehydrogenase (NADP+) [EC:1.1.1.2]                    | 0.0033     | 0.0033 | 0.0020  | 0.0014 | 0.0005 | 0.002           | 0.566 | 0.464        |
| E1.2.1.9, gapN; glyceraldehyde-3-phosphate dehydrogenase (NADP) [EC:1.2.1.9] | 0.0030     | 0.0016 | 0.0029  | 0.0025 | 0.0005 | 0.445           | 0.117 | 0.419        |
| E6.2.1.13; acetyl-CoA synthetase (ADP-forming) [EC:6.2.1.13]                 | 0.0021     | 0.0028 | 0.0024  | 0.0022 | 0.0004 | 0.737           | 0.598 | 0.248        |
| ppgK; polyphosphate glucokinase [EC:2.7.1.63]                                | 0.0024     | 0.0023 | 0.0012  | 0.0006 | 0.0004 | 0.004           | 0.419 | 0.630        |

**00020 Citrate cycle (TCA cycle) [PATH:ko00020]**

|                                                                                    |        |        |        |        |        |        |       |       |
|------------------------------------------------------------------------------------|--------|--------|--------|--------|--------|--------|-------|-------|
| korA; 2-oxoglutarate ferredoxin oxidoreductase subunit alpha [EC:1.2.7.3]          | 0.20   | 0.17   | 0.18   | 0.17   | 0.0077 | 0.255  | 0.061 | 0.260 |
| CS, gltA; citrate synthase [EC:2.3.3.1]                                            | 0.15   | 0.15   | 0.14   | 0.14   | 0.0073 | 0.385  | 0.795 | 0.759 |
| E4.2.1.2A, fumA, fumB; fumarate hydratase, class I [EC:4.2.1.2]                    | 0.14   | 0.13   | 0.12   | 0.11   | 0.0069 | 0.015  | 0.438 | 0.906 |
| korB; 2-oxoglutarate ferredoxin oxidoreductase subunit beta [EC:1.2.7.3]           | 0.13   | 0.12   | 0.12   | 0.12   | 0.0047 | 0.271  | 0.116 | 0.461 |
| E6.4.1.1B, pycB; pyruvate carboxylase subunit B [EC:6.4.1.1]                       | 0.12   | 0.11   | 0.11   | 0.10   | 0.0050 | 0.112  | 0.409 | 0.756 |
| mdh; malate dehydrogenase [EC:1.1.1.37]                                            | 0.091  | 0.091  | 0.081  | 0.077  | 0.0037 | 0.005  | 0.579 | 0.616 |
| sdhB; succinate dehydrogenase iron-sulfur subunit [EC:1.3.99.1]                    | 0.078  | 0.079  | 0.074  | 0.068  | 0.0036 | 0.049  | 0.543 | 0.309 |
| PC, pyc; pyruvate carboxylase [EC:6.4.1.1]                                         | 0.056  | 0.062  | 0.047  | 0.056  | 0.0032 | 0.032  | 0.030 | 0.659 |
| E4.2.1.2AA, fumA; fumarate hydratase subunit alpha [EC:4.2.1.2]                    | 0.053  | 0.050  | 0.058  | 0.059  | 0.0036 | 0.049  | 0.797 | 0.558 |
| korG; 2-oxoglutarate ferredoxin oxidoreductase subunit gamma [EC:1.2.7.3]          | 0.049  | 0.052  | 0.045  | 0.044  | 0.0026 | 0.016  | 0.674 | 0.473 |
| E4.2.1.2AB, fumB; fumarate hydratase subunit beta [EC:4.2.1.2]                     | 0.037  | 0.036  | 0.040  | 0.042  | 0.0028 | 0.108  | 0.887 | 0.648 |
| sdhC; succinate dehydrogenase cytochrome b556 subunit                              | 0.038  | 0.038  | 0.035  | 0.034  | 0.0023 | 0.154  | 0.770 | 0.987 |
| sucC; succinyl-CoA synthetase beta subunit [EC:6.2.1.5]                            | 0.027  | 0.038  | 0.023  | 0.025  | 0.0026 | 0.002  | 0.018 | 0.113 |
| IDH3; isocitrate dehydrogenase (NAD+) [EC:1.1.1.41]                                | 0.021  | 0.023  | 0.024  | 0.026  | 0.0020 | 0.147  | 0.486 | 0.921 |
| sucD; succinyl-CoA synthetase alpha subunit [EC:6.2.1.5]                           | 0.023  | 0.031  | 0.019  | 0.021  | 0.0021 | 0.002  | 0.017 | 0.145 |
| korD; 2-oxoglutarate ferredoxin oxidoreductase subunit delta [EC:1.2.7.3]          | 0.013  | 0.015  | 0.012  | 0.011  | 0.0008 | 0.009  | 1.000 | 0.187 |
| acnB; aconitate hydratase 2 / 2-methylisocitrate dehydratase [EC:4.2.1.3 4.2.1.99] | 0.0220 | 0.0172 | 0.0081 | 0.0037 | 0.0029 | <0.001 | 0.118 | 0.948 |
| E6.4.1.1A, pycA; pyruvate carboxylase subunit A [EC:6.4.1.1]                       | 0.0090 | 0.0115 | 0.0092 | 0.0074 | 0.0012 | 0.120  | 0.788 | 0.084 |
| LSC1; succinyl-CoA synthetase alpha subunit [EC:6.2.1.4 6.2.1.5]                   | 0.0010 | 0.0013 | 0.0008 | 0.0009 | 0.0001 | 0.025  | 0.181 | 0.470 |

**00030 Pentose phosphate pathway [PATH:ko00030]**

|                                                                     |       |       |       |       |        |       |       |       |
|---------------------------------------------------------------------|-------|-------|-------|-------|--------|-------|-------|-------|
| E2.2.1.1, tktA, tktB; transketolase [EC:2.2.1.1]                    | 0.36  | 0.33  | 0.35  | 0.35  | 0.0087 | 0.446 | 0.074 | 0.138 |
| PRPS, prsA; ribose-phosphate pyrophosphokinase [EC:2.7.6.1]         | 0.19  | 0.18  | 0.19  | 0.19  | 0.0049 | 0.129 | 0.473 | 0.740 |
| deoC, DERA; deoxyribose-phosphate aldolase [EC:4.1.2.4]             | 0.13  | 0.13  | 0.13  | 0.14  | 0.0032 | 0.770 | 0.047 | 0.657 |
| kdgK; 2-dehydro-3-deoxygluconokinase [EC:2.7.1.45]                  | 0.13  | 0.12  | 0.13  | 0.12  | 0.0047 | 0.530 | 0.104 | 0.575 |
| rpe, RPE; ribulose-phosphate 3-epimerase [EC:5.1.3.1]               | 0.13  | 0.12  | 0.13  | 0.13  | 0.0029 | 0.324 | 0.733 | 0.332 |
| deoB; phosphopentomutase [EC:5.4.2.7]                               | 0.079 | 0.084 | 0.094 | 0.095 | 0.0040 | 0.004 | 0.421 | 0.596 |
| rpiB; ribose 5-phosphate isomerase B [EC:5.3.1.6]                   | 0.072 | 0.080 | 0.071 | 0.074 | 0.0022 | 0.140 | 0.022 | 0.306 |
| E4.1.2.9; phosphoketolase [EC:4.1.2.9]                              | 0.043 | 0.054 | 0.055 | 0.055 | 0.0064 | 0.307 | 0.361 | 0.428 |
| E1.1.1.44, PGD, gnd; 6-phosphogluconate dehydrogenase [EC:1.1.1.44] | 0.030 | 0.041 | 0.038 | 0.035 | 0.0048 | 0.853 | 0.410 | 0.131 |

|                                                              |        |        |        |        |        |       |       |       |
|--------------------------------------------------------------|--------|--------|--------|--------|--------|-------|-------|-------|
| E2.2.1.2, talA, talB; transaldolase [EC:2.2.1.2]             | 0.032  | 0.033  | 0.034  | 0.034  | 0.0015 | 0.372 | 0.731 | 0.970 |
| rbsK, RBKS; ribokinase [EC:2.7.1.15]                         | 0.028  | 0.036  | 0.034  | 0.034  | 0.0035 | 0.634 | 0.280 | 0.264 |
| G6PD, zwf; glucose-6-phosphate 1-dehydrogenase [EC:1.1.1.49] | 0.024  | 0.032  | 0.033  | 0.028  | 0.0051 | 0.629 | 0.781 | 0.211 |
| E2.7.1.12, gntK, idnK; gluconokinase [EC:2.7.1.12]           | 0.022  | 0.033  | 0.031  | 0.028  | 0.0044 | 0.634 | 0.345 | 0.108 |
| pgl; 6-phosphogluconolactonase [EC:3.1.1.31]                 | 0.018  | 0.024  | 0.025  | 0.024  | 0.0028 | 0.206 | 0.425 | 0.166 |
| rpiA; ribose 5-phosphate isomerase A [EC:5.3.1.6]            | 0.019  | 0.019  | 0.020  | 0.019  | 0.0023 | 0.945 | 0.996 | 0.756 |
| hxlB; 6-phospho-3-hexuloisomerase [EC:5.3.1.27]              | 0.0010 | 0.0011 | 0.0006 | 0.0015 | 0.0002 | 0.957 | 0.053 | 0.137 |

#### 00052 Galactose metabolism [PATH:ko00052]

|                                                                              |          |          |           |          |        |       |       |       |
|------------------------------------------------------------------------------|----------|----------|-----------|----------|--------|-------|-------|-------|
| lacZ; beta-galactosidase [EC:3.2.1.23]                                       | 0.65     | 0.65     | 0.65      | 0.65     | 0.0229 | 0.968 | 0.977 | 0.907 |
| E3.2.1.22B, galA, rafA; alpha-galactosidase [EC:3.2.1.22]                    | 0.34     | 0.34     | 0.32      | 0.36     | 0.0116 | 0.703 | 0.070 | 0.190 |
| galE, GALE; UDP-glucose 4-epimerase [EC:5.1.3.2]                             | 0.29     | 0.28     | 0.30      | 0.30     | 0.0063 | 0.011 | 0.147 | 0.450 |
| E3.2.1.20, malZ; alpha-glucosidase [EC:3.2.1.20]                             | 0.21     | 0.23     | 0.23      | 0.23     | 0.0117 | 0.279 | 0.303 | 0.461 |
| galK; galactokinase [EC:2.7.1.6]                                             | 0.16     | 0.16     | 0.17      | 0.17     | 0.0040 | 0.214 | 0.971 | 0.752 |
| bgaB, lacA; beta-galactosidase [EC:3.2.1.23]                                 | 0.14     | 0.13     | 0.16      | 0.16     | 0.0069 | 0.004 | 0.562 | 0.428 |
| galT, GALT; UDPglucose--hexose-1-phosphate uridylyltransferase [EC:2.7.7.12] | 0.10     | 0.12     | 0.12      | 0.13     | 0.0070 | 0.057 | 0.181 | 0.542 |
| E3.2.1.10; oligo-1,6-glucosidase [EC:3.2.1.10]                               | 0.067    | 0.077    | 0.076     | 0.082    | 0.0044 | 0.142 | 0.079 | 0.712 |
| E3.2.1.26, sacA; beta-fructofuranosidase [EC:3.2.1.26]                       | 0.059    | 0.069    | 0.073     | 0.076    | 0.0044 | 0.025 | 0.135 | 0.445 |
| E3.2.1.85, lacG; 6-phospho-beta-galactosidase [EC:3.2.1.85]                  | 0.022    | 0.032    | 0.020     | 0.030    | 0.0037 | 0.519 | 0.012 | 0.975 |
| lacC; tagatose 6-phosphate kinase [EC:2.7.1.144]                             | 0.011    | 0.013    | 0.014     | 0.011    | 0.0019 | 0.733 | 0.738 | 0.213 |
| melA; alpha-galactosidase [EC:3.2.1.22]                                      | 0.008    | 0.005    | 0.011     | 0.011    | 0.0018 | 0.024 | 0.340 | 0.509 |
| gatY-kbaY; tagatose 1,6-diphosphate aldolase GatY/KbaY [EC:4.1.2.40]         | 0.0070   | 0.0110   | 0.0068    | 0.0084   | 0.0010 | 0.164 | 0.008 | 0.249 |
| E5.3.1.26, lacA, lacB; galactose-6-phosphate isomerase [EC:5.3.1.26]         | 0.0048   | 0.0093   | 0.0050    | 0.0070   | 0.0016 | 0.522 | 0.056 | 0.466 |
| ebgA; evolved beta-galactosidase subunit alpha [EC:3.2.1.23]                 | 0.0064   | 0.0049   | 0.0060    | 0.0064   | 0.0006 | 0.388 | 0.323 | 0.130 |
| lacD; tagatose 1,6-diphosphate aldolase [EC:4.1.2.40]                        | 0.0060   | 0.0069   | 0.0038    | 0.0066   | 0.0022 | 0.567 | 0.420 | 0.675 |
| dgoD; galactonate dehydratase [EC:4.2.1.6]                                   | 0.0045 a | 0.0032 b | 0.0041 ab | 0.0052 a | 0.0005 | 0.151 | 0.873 | 0.039 |

#### 00500 Starch and sucrose metabolism [PATH:ko00500]

|                                                        |      |      |      |      |        |       |       |       |
|--------------------------------------------------------|------|------|------|------|--------|-------|-------|-------|
| E2.4.1.1, glgP, PYG; starch phosphorylase [EC:2.4.1.1] | 0.41 | 0.39 | 0.43 | 0.42 | 0.0123 | 0.039 | 0.130 | 0.637 |
| glgB; 1,4-alpha-glucan branching enzyme [EC:2.4.1.18]  | 0.30 | 0.28 | 0.30 | 0.29 | 0.0068 | 0.367 | 0.138 | 0.533 |
| malQ; 4-alpha-glucanotransferase [EC:2.4.1.25]         | 0.27 | 0.26 | 0.27 | 0.27 | 0.0068 | 0.193 | 0.339 | 0.265 |



|                                                                                                  |        |        |        |        |        |       |       |       |
|--------------------------------------------------------------------------------------------------|--------|--------|--------|--------|--------|-------|-------|-------|
| glgC; glucose-1-phosphate adenyltransferase [EC:2.7.7.27]                                        | 0.17   | 0.17   | 0.19   | 0.18   | 0.0086 | 0.142 | 0.645 | 0.270 |
| E2.4.1.21, glgA; starch synthase [EC:2.4.1.21]                                                   | 0.16   | 0.16   | 0.17   | 0.17   | 0.0062 | 0.234 | 0.627 | 0.550 |
| E3.2.1.1A; alpha-amylase [EC:3.2.1.1]                                                            | 0.092  | 0.092  | 0.084  | 0.086  | 0.0053 | 0.162 | 0.858 | 0.833 |
| E2.4.1.8, mapA; maltose phosphorylase [EC:2.4.1.8]                                               | 0.048  | 0.066  | 0.057  | 0.059  | 0.0093 | 0.877 | 0.312 | 0.387 |
| E3.2.1.4; endoglucanase [EC:3.2.1.4]                                                             | 0.059  | 0.048  | 0.058  | 0.055  | 0.0030 | 0.351 | 0.031 | 0.143 |
| rfbF; glucose-1-phosphate cytidyltransferase [EC:2.7.7.33]                                       | 0.060  | 0.052  | 0.049  | 0.047  | 0.0038 | 0.054 | 0.171 | 0.462 |
| E2.4.1.7; sucrose phosphorylase [EC:2.4.1.7]                                                     | 0.035  | 0.049  | 0.053  | 0.052  | 0.0057 | 0.088 | 0.286 | 0.227 |
| xynB; xylan 1,4-beta-xylosidase [EC:3.2.1.37]                                                    | 0.033  | 0.034  | 0.036  | 0.034  | 0.0027 | 0.567 | 0.654 | 0.527 |
| E3.2.1.1, amyA, malS; alpha-amylase [EC:3.2.1.1]                                                 | 0.028  | 0.028  | 0.027  | 0.033  | 0.0023 | 0.399 | 0.185 | 0.232 |
| E3.2.1.122, glvA; maltose-6'-phosphate glucosidase [EC:3.2.1.122]                                | 0.026  | 0.028  | 0.031  | 0.030  | 0.0041 | 0.458 | 0.804 | 0.668 |
| treC; trehalose-6-phosphate hydrolase [EC:3.2.1.93]                                              | 0.024  | 0.032  | 0.024  | 0.031  | 0.0029 | 0.821 | 0.012 | 0.906 |
| treS; maltose alpha-D-glucosyltransferase/ alpha-amylase [EC:5.4.99.16 3.2.1.1]                  | 0.017  | 0.019  | 0.020  | 0.019  | 0.0013 | 0.202 | 0.504 | 0.285 |
| pgmB; beta-phosphoglucomutase [EC:5.4.2.6]                                                       | 0.015  | 0.018  | 0.019  | 0.019  | 0.0023 | 0.348 | 0.456 | 0.552 |
| E2.4.1.20; cellobiose phosphorylase [EC:2.4.1.20]                                                | 0.015  | 0.012  | 0.014  | 0.015  | 0.0017 | 0.748 | 0.604 | 0.208 |
| E2.4.1.4; amylosucrase [EC:2.4.1.4]                                                              | 0.011  | 0.012  | 0.012  | 0.014  | 0.0012 | 0.233 | 0.324 | 0.562 |
| E3.2.1.54; cyclomaltodextrinase [EC:3.2.1.54]                                                    | 0.0022 | 0.0022 | 0.0031 | 0.0041 | 0.0004 | 0.001 | 0.172 | 0.193 |
| E3.2.1.91; cellulose 1,4-beta-cellobiosidase [EC:3.2.1.91]                                       | 0.0026 | 0.0015 | 0.0015 | 0.0018 | 0.0003 | 0.165 | 0.190 | 0.037 |
| ENPP1_3; ectonucleotide pyrophosphatase/phosphodiesterase family member 1/3 [EC:3.1.4.1 3.6.1.9] | 0.0011 | 0.0013 | 0.0008 | 0.0010 | 0.0002 | 0.165 | 0.529 | 0.928 |

#### 00520 Amino sugar and nucleotide sugar metabolism [PATH:ko00520]

|                                                                                                                                    |       |       |       |       |        |       |       |       |
|------------------------------------------------------------------------------------------------------------------------------------|-------|-------|-------|-------|--------|-------|-------|-------|
| murA; UDP-N-acetylglucosamine 1-carboxyvinyltransferase [EC:2.5.1.7]                                                               | 0.28  | 0.28  | 0.29  | 0.30  | 0.0065 | 0.010 | 0.840 | 0.322 |
| wecB; UDP-N-acetylglucosamine 2-epimerase [EC:5.1.3.14]                                                                            | 0.20  | 0.20  | 0.21  | 0.19  | 0.0075 | 0.927 | 0.306 | 0.376 |
| nagB, GNPDA; glucosamine-6-phosphate deaminase [EC:3.5.99.6]                                                                       | 0.19  | 0.21  | 0.17  | 0.19  | 0.0115 | 0.057 | 0.101 | 0.674 |
| glmM; phosphoglucomutase [EC:5.4.2.10]                                                                                             | 0.15  | 0.15  | 0.16  | 0.16  | 0.0062 | 0.061 | 1.000 | 0.783 |
| murB; UDP-N-acetylmuramate dehydrogenase [EC:1.1.1.158]                                                                            | 0.11  | 0.12  | 0.12  | 0.12  | 0.0020 | 0.722 | 0.214 | 0.261 |
| npdA; NAD-dependent deacetylase [EC:3.5.1.-]                                                                                       | 0.11  | 0.11  | 0.12  | 0.12  | 0.0024 | 0.192 | 0.996 | 0.377 |
| E3.2.1.55, abfA; alpha-N-arabinofuranosidase [EC:3.2.1.55]                                                                         | 0.11  | 0.10  | 0.11  | 0.11  | 0.0047 | 0.484 | 0.797 | 0.423 |
| glmU; bifunctional UDP-N-acetylglucosamine pyrophosphorylase / Glucosamine-1-phosphate N-acetyltransferase [EC:2.7.7.23 2.3.1.157] | 0.10  | 0.11  | 0.10  | 0.10  | 0.0050 | 0.768 | 0.306 | 0.658 |
| E3.5.1.25, nagA, AMDHD2; N-acetylglucosamine-6-phosphate deacetylase [EC:3.5.1.25]                                                 | 0.078 | 0.079 | 0.084 | 0.082 | 0.0033 | 0.241 | 0.924 | 0.623 |

|                                                                           |        |        |        |        |        |       |       |       |
|---------------------------------------------------------------------------|--------|--------|--------|--------|--------|-------|-------|-------|
| E2.5.1.56, neuB; N-acetylneuraminate synthase [EC:2.5.1.56]               | 0.056  | 0.055  | 0.068  | 0.065  | 0.0077 | 0.183 | 0.792 | 0.925 |
| murQ; N-acetylmuramic acid 6-phosphate etherase [EC:4.2.1.126]            | 0.050  | 0.065  | 0.046  | 0.053  | 0.0037 | 0.032 | 0.008 | 0.314 |
| wbpO; UDP-N-acetyl-D-galactosamine dehydrogenase [EC:1.1.1.-]             | 0.049  | 0.056  | 0.054  | 0.040  | 0.0053 | 0.323 | 0.540 | 0.070 |
| rfbG; CDP-glucose 4,6-dehydratase [EC:4.2.1.45]                           | 0.055  | 0.050  | 0.044  | 0.045  | 0.0047 | 0.106 | 0.779 | 0.535 |
| E4.1.3.3, nanA, NPL; N-acetylneuraminate lyase [EC:4.1.3.3]               | 0.038  | 0.037  | 0.041  | 0.039  | 0.0025 | 0.394 | 0.651 | 0.861 |
| E3.2.1.52, nagZ; beta-N-acetylhexosaminidase [EC:3.2.1.52]                | 0.036  | 0.036  | 0.039  | 0.041  | 0.0020 | 0.061 | 0.637 | 0.650 |
| rfbH; CDP-6-deoxy-D-xylo-4-hexulose-3-dehydrase                           | 0.043  | 0.031  | 0.040  | 0.034  | 0.0034 | 0.977 | 0.016 | 0.369 |
| RENBP; N-acylglucosamine 2-epimerase [EC:5.1.3.8]                         | 0.030  | 0.031  | 0.031  | 0.029  | 0.0020 | 0.985 | 0.692 | 0.622 |
| E2.7.7.43, neuA, CMAS; N-acylneuraminate cytidyltransferase [EC:2.7.7.43] | 0.020  | 0.019  | 0.022  | 0.023  | 0.0036 | 0.356 | 0.969 | 0.882 |
| UAP1; UDP-N-acetylglucosamine pyrophosphorylase [EC:2.7.7.23]             | 0.018  | 0.018  | 0.021  | 0.019  | 0.0022 | 0.327 | 0.666 | 0.695 |
| nanE; N-acylglucosamine-6-phosphate 2-epimerase [EC:5.1.3.9]              | 0.0098 | 0.0096 | 0.0103 | 0.0116 | 0.0009 | 0.198 | 0.559 | 0.436 |
| wecC; UDP-N-acetyl-D-mannosaminuronic acid dehydrogenase [EC:1.1.1.336]   | 0.0068 | 0.0059 | 0.0072 | 0.0089 | 0.0009 | 0.061 | 0.675 | 0.132 |
| rfbE; CDP-paratose 2-epimerase [EC:5.1.3.10]                              | 0.0010 | 0.0015 | 0.0006 | 0.0010 | 0.0005 | 0.304 | 0.317 | 0.968 |

#### 00620 Pyruvate metabolism [PATH:ko00620]

|                                                                                           |        |        |         |        |        |       |       |       |
|-------------------------------------------------------------------------------------------|--------|--------|---------|--------|--------|-------|-------|-------|
| ppdK; pyruvate,orthophosphate dikinase [EC:2.7.9.1]                                       | 0.39 a | 0.35 b | 0.37 ab | 0.39 a | 0.0098 | 0.181 | 0.257 | 0.019 |
| E2.3.1.54, pflD; formate C-acetyltransferase [EC:2.3.1.54]                                | 0.24   | 0.27   | 0.26    | 0.29   | 0.0081 | 0.042 | 0.004 | 0.707 |
| ackA; acetate kinase [EC:2.7.2.1]                                                         | 0.24   | 0.23   | 0.27    | 0.26   | 0.0097 | 0.003 | 0.177 | 0.666 |
| E2.3.1.8, pta; phosphate acetyltransferase [EC:2.3.1.8]                                   | 0.15   | 0.15   | 0.15    | 0.15   | 0.0044 | 0.803 | 0.759 | 0.627 |
| E1.1.1.40, maeB; malate dehydrogenase (oxaloacetate-decarboxylating)(NADP+) [EC:1.1.1.40] | 0.15   | 0.14   | 0.13    | 0.13   | 0.0080 | 0.042 | 0.416 | 0.618 |
| accC; acetyl-CoA carboxylase, biotin carboxylase subunit [EC:6.4.1.2 6.3.4.14]            | 0.074  | 0.077  | 0.080   | 0.077  | 0.0043 | 0.458 | 0.912 | 0.532 |
| fucO; lactaldehyde reductase [EC:1.1.1.77]                                                | 0.074  | 0.074  | 0.082   | 0.076  | 0.0050 | 0.360 | 0.611 | 0.574 |
| ldhA; D-lactate dehydrogenase [EC:1.1.1.28]                                               | 0.064  | 0.070  | 0.069   | 0.075  | 0.0055 | 0.341 | 0.254 | 0.955 |
| ppc; phosphoenolpyruvate carboxylase [EC:4.1.1.31]                                        | 0.046  | 0.054  | 0.046   | 0.047  | 0.0071 | 0.670 | 0.523 | 0.655 |
| accA; acetyl-CoA carboxylase carboxyl transferase subunit alpha [EC:6.4.1.2]              | 0.048  | 0.044  | 0.046   | 0.046  | 0.0020 | 0.874 | 0.339 | 0.410 |
| accD; acetyl-CoA carboxylase carboxyl transferase subunit beta [EC:6.4.1.2]               | 0.038  | 0.037  | 0.039   | 0.041  | 0.0027 | 0.394 | 0.782 | 0.474 |
| E3.1.2.1, ACH1; acetyl-CoA hydrolase [EC:3.1.2.1]                                         | 0.037  | 0.045  | 0.035   | 0.033  | 0.0024 | 0.008 | 0.203 | 0.078 |
| E1.2.3.3, poxL; pyruvate oxidase [EC:1.2.3.3]                                             | 0.031  | 0.037  | 0.038   | 0.032  | 0.0061 | 0.868 | 0.895 | 0.335 |
| pps, ppsA; pyruvate, water dikinase [EC:2.7.9.2]                                          | 0.028  | 0.037  | 0.024   | 0.032  | 0.0029 | 0.150 | 0.010 | 0.818 |
| E4.2.3.3, mgsA; methylglyoxal synthase [EC:4.2.3.3]                                       | 0.026  | 0.024  | 0.030   | 0.030  | 0.0017 | 0.008 | 0.536 | 0.650 |

|                                                                                           |          |          |          |          |        |        |       |       |
|-------------------------------------------------------------------------------------------|----------|----------|----------|----------|--------|--------|-------|-------|
| accB, bccP; acetyl-CoA carboxylase biotin carboxyl carrier protein                        | 0.012    | 0.011    | 0.011    | 0.012    | 0.0008 | 0.610  | 0.987 | 0.276 |
| aldA; lactaldehyde dehydrogenase / glycolaldehyde dehydrogenase [EC:1.2.1.22<br>1.2.1.21] | 0.0091   | 0.0036   | 0.0088   | 0.0144   | 0.0028 | 0.068  | 1.000 | 0.057 |
| acyP; acylphosphatase [EC:3.6.1.7]                                                        | 0.0077   | 0.0103   | 0.0079   | 0.0089   | 0.0012 | 0.609  | 0.138 | 0.519 |
| pct; propionate CoA-transferase [EC:2.8.3.1]                                              | 0.0068   | 0.0103   | 0.0061   | 0.0071   | 0.0010 | 0.063  | 0.029 | 0.211 |
| E3.1.2.6, gloB; hydroxyacylglutathione hydrolase [EC:3.1.2.6]                             | 0.0071   | 0.0053   | 0.0067   | 0.0067   | 0.0005 | 0.330  | 0.070 | 0.077 |
| pta; phosphate acetyltransferase [EC:2.3.1.8]                                             | 0.0090   | 0.0071   | 0.0046   | 0.0029   | 0.0010 | <0.001 | 0.100 | 0.920 |
| mqo; malate dehydrogenase (quinone) [EC:1.1.5.4]                                          | 0.0046   | 0.0058   | 0.0031   | 0.0010   | 0.0013 | 0.019  | 0.711 | 0.208 |
| ACAC; acetyl-CoA carboxylase / biotin carboxylase [EC:6.4.1.2 6.3.4.14]                   | 0.0012 b | 0.0007 b | 0.0009 b | 0.0022 a | 0.0004 | 0.148  | 0.350 | 0.022 |
| E1.2.1.10; acetaldehyde dehydrogenase (acetylating) [EC:1.2.1.10]                         | 0.0011   | 0.0008   | 0.0016   | 0.0012   | 0.0002 | 0.018  | 0.030 | 0.794 |

#### 00640 Propanoate metabolism [PATH:ko00640]

|                                                                      |        |        |        |        |        |       |       |       |
|----------------------------------------------------------------------|--------|--------|--------|--------|--------|-------|-------|-------|
| mmdA; methylmalonyl-CoA decarboxylase alpha chain [EC:4.1.1.41]      | 0.012  | 0.011  | 0.010  | 0.012  | 0.0006 | 0.769 | 0.976 | 0.036 |
| E2.3.3.5, prpC; 2-methylcitrate synthase [EC:2.3.3.5]                | 0.0098 | 0.0101 | 0.0117 | 0.0094 | 0.0013 | 0.664 | 0.427 | 0.341 |
| mmdB; methylmalonyl-CoA decarboxylase beta chain [EC:4.1.1.41]       | 0.0073 | 0.0071 | 0.0072 | 0.0070 | 0.0004 | 0.798 | 0.600 | 0.988 |
| E4.2.1.79, prpD; 2-methylcitrate dehydratase [EC:4.2.1.79]           | 0.0038 | 0.0055 | 0.0032 | 0.0006 | 0.0012 | 0.035 | 0.704 | 0.092 |
| E4.1.3.30, prpB; methylisocitrate lyase [EC:4.1.3.30]                | 0.0028 | 0.0043 | 0.0020 | 0.0007 | 0.0009 | 0.025 | 0.913 | 0.132 |
| E3.5.99.7; 1-aminocyclopropane-1-carboxylate deaminase [EC:3.5.99.7] | 0.0016 | 0.0020 | 0.0013 | 0.0006 | 0.0004 | 0.027 | 0.788 | 0.138 |

#### 00650 Butanoate metabolism [PATH:ko00650]

|                                                               |           |           |           |           |        |       |       |       |
|---------------------------------------------------------------|-----------|-----------|-----------|-----------|--------|-------|-------|-------|
| E2.7.2.7, buk; butyrate kinase [EC:2.7.2.7]                   | 0.077 a   | 0.059 b   | 0.074 a   | 0.076 a   | 0.0040 | 0.096 | 0.068 | 0.020 |
| E4.1.1.70; glutaconyl-CoA decarboxylase [EC:4.1.1.70]         | 0.035     | 0.043     | 0.035     | 0.035     | 0.0020 | 0.060 | 0.063 | 0.083 |
| ptb; phosphate butyryltransferase [EC:2.3.1.19]               | 0.038     | 0.029     | 0.038     | 0.041     | 0.0030 | 0.055 | 0.466 | 0.055 |
| E4.1.1.5, alsD; acetolactate decarboxylase [EC:4.1.1.5]       | 0.0061    | 0.0076    | 0.0040    | 0.0075    | 0.0020 | 0.595 | 0.217 | 0.621 |
| E4.2.1.-; [EC:4.2.1.-]                                        | 0.0048 a  | 0.0039 b  | 0.0033 b  | 0.0045 ab | 0.0003 | 0.222 | 0.706 | 0.007 |
| E1.1.1.30, bdh; 3-hydroxybutyrate dehydrogenase [EC:1.1.1.30] | 0.0017 ab | 0.0012 b  | 0.0014 ab | 0.0018 a  | 0.0002 | 0.593 | 0.688 | 0.016 |
| E1.3.1.44; trans-2-enoyl-CoA reductase (NAD+) [EC:1.3.1.44]   | 0.0017    | 0.0014    | 0.0014    | 0.0011    | 0.0002 | 0.173 | 0.315 | 0.915 |
| E1.1.1.61; 4-hydroxybutyrate dehydrogenase [EC:1.1.1.61]      | 0.0015    | 0.0014    | 0.0011    | 0.0015    | 0.0001 | 0.279 | 0.241 | 0.109 |
| gctB; glutaconate CoA-transferase, subunit B [EC:2.8.3.12]    | 0.0017 a  | 0.0012 ab | 0.0010 b  | 0.0012 ab | 0.0002 | 0.079 | 0.494 | 0.048 |

89 Values are presented as least square means  $\pm$  SEM. (n = 8 pigs per dietary treatment). <sup>a,b</sup>Different superscripts within a row indicate

90 significant difference ( $P \leq 0.05$ ). Con, control; LA, lactic acid-treated cereals.

91 **TABLE S7** Selected COGs (Clusters of Orthologous Groups) function in carbohydrate metabolism in cecal digesta of pigs fed diets with  
 92 or without phytase and lactic acid treatment of cereals

| COG Function                                                   | No phytase |        | Phytase |        | SEM   | P-value |       |            |
|----------------------------------------------------------------|------------|--------|---------|--------|-------|---------|-------|------------|
|                                                                | Con        | LA     | Con     | LA     |       | Phytase | LA    | Phytase×LA |
| Alpha-glucosidases, family 31 of glycosyl hydrolases           | 2.65       | 2.87   | 2.66    | 2.81   | 0.089 | 0.813   | 0.047 | 0.675      |
| Sugar pentulose and hexulose kinases                           | 2.57       | 2.77   | 2.53    | 2.47   | 0.084 | 0.050   | 0.404 | 0.136      |
| Nucleoside-diphosphate-sugar epimerases                        | 2.59       | 2.36   | 2.46    | 2.12   | 0.100 | 0.079   | 0.010 | 0.588      |
| Phosphoenolpyruvate synthase pyruvate phosphate dikinase       | 2.42 a     | 2.08 b | 2.30 a  | 2.32 a | 0.085 | 0.461   | 0.066 | 0.048      |
| Beta-glucosidase 6-phospho-beta-glucosidase beta-galactosidase | 1.65       | 2.18   | 1.89    | 2.19   | 0.137 | 0.381   | 0.005 | 0.419      |
| Alpha-galactosidase                                            | 1.78       | 2.00   | 1.72    | 1.95   | 0.072 | 0.444   | 0.004 | 0.919      |
| Glucan phosphorylase                                           | 1.74       | 1.48   | 1.79    | 1.69   | 0.083 | 0.133   | 0.044 | 0.351      |
| Predicted nucleoside-diphosphate sugar epimerases              | 1.70       | 1.38   | 1.82    | 1.57   | 0.098 | 0.125   | 0.008 | 0.690      |
| Fucose permease                                                | 1.59       | 1.61   | 1.45    | 1.37   | 0.096 | 0.063   | 0.774 | 0.645      |
| 6-phosphofructokinase                                          | 1.56 a     | 1.32 b | 1.52 a  | 1.56 a | 0.065 | 0.144   | 0.143 | 0.039      |
| 3-phosphoglycerate kinase                                      | 1.49       | 1.41   | 1.48    | 1.40   | 0.031 | 0.840   | 0.016 | 0.926      |
| 1,4-alpha-glucan branching enzyme                              | 1.22       | 1.08   | 1.22    | 1.13   | 0.052 | 0.633   | 0.036 | 0.558      |
| ABC-type sugar transport systems, ATPase components            | 1.05       | 0.93   | 1.12    | 1.14   | 0.063 | 0.029   | 0.421 | 0.270      |
| Cellobiose phosphorylase                                       | 1.07 a     | 0.95 b | 1.03 a  | 1.11 b | 0.045 | 0.165   | 0.615 | 0.036      |
| 6-phosphogluconolactonase                                      | 1.04       | 1.12   | 0.98    | 0.99   | 0.046 | 0.054   | 0.342 | 0.414      |
| Glucosamine-6-phosphate isomerase deaminase                    |            |        |         |        |       |         |       |            |
| Glucose-6-phosphate isomerase                                  | 1.03       | 0.94   | 1.03    | 1.01   | 0.027 | 0.240   | 0.045 | 0.224      |

|                                                                                          |        |        |        |        |       |       |       |       |
|------------------------------------------------------------------------------------------|--------|--------|--------|--------|-------|-------|-------|-------|
| Phosphotransferase system IIC components, glucose maltose N-acetylglucosamine-specific   | 0.87   | 1.19   | 0.90   | 1.06   | 0.108 | 0.679 | 0.034 | 0.470 |
| Enolase                                                                                  | 0.98   | 1.03   | 0.92   | 1.07   | 0.046 | 0.791 | 0.033 | 0.243 |
| Dihydroxyacid dehydratase phosphogluconate dehydratase                                   | 1.02   | 0.93   | 0.97   | 0.90   | 0.036 | 0.233 | 0.037 | 0.855 |
| Transketolase                                                                            | 1.06   | 0.90   | 0.98   | 0.84   | 0.051 | 0.194 | 0.008 | 0.757 |
| 4-alpha-glucanotransferase                                                               | 0.97   | 0.85   | 1.01   | 0.92   | 0.050 | 0.334 | 0.046 | 0.755 |
| Glyceraldehyde-3-phosphate dehydrogenase erythrose-4-phosphate dehydrogenase             | 0.86   | 0.79   | 0.85   | 0.79   | 0.024 | 0.724 | 0.016 | 0.936 |
| Beta-galactosidase                                                                       | 0.81   | 0.71   | 0.92   | 0.85   | 0.037 | 0.003 | 0.023 | 0.650 |
| Ribulose-5-phosphate 4-epimerase and related epimerases and aldolases                    | 0.84   | 0.89   | 0.77   | 0.76   | 0.038 | 0.014 | 0.657 | 0.485 |
| Pyruvate kinase                                                                          | 0.78   | 0.74   | 0.80   | 0.86   | 0.031 | 0.042 | 0.702 | 0.098 |
| L-arabinose isomerase                                                                    | 0.75 b | 0.90 a | 0.79 b | 0.72 b | 0.040 | 0.093 | 0.323 | 0.011 |
| ABC-type sugar transport systems, permease components                                    | 0.72   | 0.74   | 0.84   | 0.84   | 0.050 | 0.040 | 0.790 | 0.848 |
| ABC-type sugar transport system, permease component                                      | 0.54   | 0.52   | 0.70   | 0.72   | 0.040 | 0.000 | 0.956 | 0.651 |
| Uncharacterized protein conserved in bacteria                                            | 0.62   | 0.55   | 0.66   | 0.62   | 0.030 | 0.077 | 0.075 | 0.651 |
| ABC-type sugar transport system, ATPase component                                        | 0.59   | 0.49   | 0.59   | 0.68   | 0.057 | 0.115 | 0.961 | 0.094 |
| Phosphoenolpyruvate-protein kinase PTS system EI component in bacteria                   | 0.49   | 0.59   | 0.55   | 0.64   | 0.035 | 0.126 | 0.012 | 0.971 |
| Phosphopentomutase                                                                       | 0.45   | 0.53   | 0.56   | 0.56   | 0.030 | 0.021 | 0.197 | 0.164 |
| Phosphotransferase system, mannose fructose N-acetylgalactosamine-specific component IID | 0.45   | 0.61   | 0.46   | 0.52   | 0.057 | 0.436 | 0.068 | 0.391 |

|                                                                                          |        |        |        |        |       |       |       |       |
|------------------------------------------------------------------------------------------|--------|--------|--------|--------|-------|-------|-------|-------|
| Phosphotransferase system, mannose fructose N-acetylgalactosamine-specific component IIC | 0.45   | 0.60   | 0.44   | 0.54   | 0.071 | 0.611 | 0.088 | 0.699 |
| Predicted xylanase chitin deacetylase                                                    | 0.49   | 0.37   | 0.50   | 0.55   | 0.044 | 0.034 | 0.494 | 0.056 |
| Phosphomannose isomerase                                                                 | 0.48 a | 0.43 b | 0.47 a | 0.49 a | 0.012 | 0.038 | 0.195 | 0.027 |
| 5-keto 4-deoxyuronate isomerase                                                          | 0.48   | 0.35   | 0.42   | 0.36   | 0.033 | 0.489 | 0.008 | 0.377 |
| Transketolase, C-terminal subunit                                                        | 0.38   | 0.34   | 0.36   | 0.39   | 0.018 | 0.423 | 0.852 | 0.063 |
| Arabinogalactan endo-1,4-beta-galactosidase                                              | 0.34   | 0.35   | 0.38   | 0.38   | 0.019 | 0.080 | 0.721 | 0.781 |
| Transcriptional regulators of sugar metabolism                                           | 0.31   | 0.44   | 0.31   | 0.37   | 0.029 | 0.263 | 0.004 | 0.281 |
| TRAP-type C4-dicarboxylate transport system, large permease component                    | 0.36   | 0.32   | 0.38   | 0.38   | 0.019 | 0.033 | 0.231 | 0.209 |
| Transketolase, N-terminal subunit                                                        | 0.37   | 0.33   | 0.35   | 0.39   | 0.020 | 0.284 | 0.883 | 0.072 |
| Mannose-6-phosphate isomerase                                                            | 0.35   | 0.39   | 0.29   | 0.25   | 0.030 | 0.003 | 0.950 | 0.185 |
| Predicted phosphoglycerate mutase, AP superfamily                                        | 0.34   | 0.32   | 0.30   | 0.29   | 0.019 | 0.068 | 0.385 | 0.798 |
| Pectin methylesterase                                                                    | 0.34   | 0.33   | 0.27   | 0.26   | 0.027 | 0.021 | 0.593 | 0.928 |
| Arabinose efflux permease                                                                | 0.27   | 0.39   | 0.26   | 0.27   | 0.032 | 0.044 | 0.052 | 0.086 |
| Phosphoglycerate mutase 1                                                                | 0.24   | 0.35   | 0.28   | 0.30   | 0.035 | 0.828 | 0.065 | 0.225 |
| Endoglucanase Y                                                                          | 0.29   | 0.25   | 0.31   | 0.31   | 0.017 | 0.024 | 0.190 | 0.342 |
| Phosphotransferase system IIA components                                                 | 0.24   | 0.35   | 0.24   | 0.33   | 0.047 | 0.786 | 0.043 | 0.776 |
| Endoglucanase                                                                            | 0.35 a | 0.22 b | 0.26 b | 0.26 b | 0.019 | 0.251 | 0.003 | 0.004 |
| Cellulase M and related proteins                                                         | 0.24   | 0.25   | 0.28   | 0.30   | 0.023 | 0.091 | 0.632 | 0.893 |
| Beta-1,4-xylanase                                                                        | 0.30   | 0.27   | 0.23   | 0.22   | 0.017 | 0.001 | 0.333 | 0.715 |
| 2-keto-3-deoxy-6-phosphogluconate aldolase                                               | 0.25   | 0.18   | 0.24   | 0.24   | 0.016 | 0.187 | 0.026 | 0.060 |
| Maltose-binding periplasmic                                                              | 0.24   | 0.25   | 0.18   | 0.18   | 0.031 | 0.044 | 0.929 | 0.696 |

proteins domains

|                                                                                             |        |        |        |        |       |       |       |       |
|---------------------------------------------------------------------------------------------|--------|--------|--------|--------|-------|-------|-------|-------|
| Alpha-glucuronidase                                                                         | 0.21   | 0.22   | 0.19   | 0.18   | 0.015 | 0.082 | 0.885 | 0.538 |
| Phosphotransferase system, mannose fructose-specific component IIA                          | 0.17   | 0.26   | 0.13   | 0.22   | 0.044 | 0.343 | 0.067 | 0.981 |
| Phosphoheptose isomerase                                                                    | 0.15 b | 0.21 a | 0.16 b | 0.12 b | 0.020 | 0.100 | 0.725 | 0.019 |
| Xylose isomerase                                                                            | 0.18   | 0.14   | 0.19   | 0.10   | 0.019 | 0.457 | 0.002 | 0.232 |
| TRAP-type C4-dicarboxylate transport system, periplasmic component                          | 0.15   | 0.12   | 0.16   | 0.16   | 0.009 | 0.004 | 0.199 | 0.103 |
| Beta-mannanase                                                                              | 0.16   | 0.11   | 0.14   | 0.14   | 0.013 | 0.974 | 0.045 | 0.134 |
| ABC-type polysaccharide transport system, permease component                                | 0.10   | 0.08   | 0.13   | 0.16   | 0.015 | 0.001 | 0.953 | 0.147 |
| Pectate lyase                                                                               | 0.12   | 0.09   | 0.11   | 0.10   | 0.010 | 0.941 | 0.086 | 0.172 |
| Neutral trehalase                                                                           | 0.090  | 0.062  | 0.102  | 0.109  | 0.015 | 0.061 | 0.495 | 0.261 |
| Phosphotransferase system, HPr-related proteins                                             | 0.078  | 0.079  | 0.084  | 0.098  | 0.007 | 0.091 | 0.316 | 0.355 |
| Citrate lyase beta subunit                                                                  | 0.085  | 0.094  | 0.064  | 0.090  | 0.008 | 0.112 | 0.026 | 0.267 |
| Archaeal fructose-1,6-bisphosphatase and related enzymes of inositol monophosphatase family | 0.098  | 0.067  | 0.083  | 0.068  | 0.007 | 0.330 | 0.004 | 0.309 |
| Fructose-1,6-bisphosphatase sedoheptulose 1,7-bisphosphatase and related proteins           | 0.078  | 0.099  | 0.054  | 0.069  | 0.008 | 0.003 | 0.034 | 0.708 |
| Phosphoglucomutase                                                                          | 0.095  | 0.088  | 0.052  | 0.043  | 0.010 | 0.000 | 0.445 | 0.924 |
| Endo-beta-mannanase                                                                         | 0.080  | 0.058  | 0.066  | 0.068  | 0.007 | 0.737 | 0.132 | 0.083 |
| Phosphotransferase system cellobiose-specific component IIB                                 | 0.056  | 0.066  | 0.056  | 0.092  | 0.008 | 0.110 | 0.009 | 0.117 |
| TRAP-type C4-dicarboxylate transport system, small permease component                       | 0.051  | 0.036  | 0.052  | 0.049  | 0.004 | 0.147 | 0.056 | 0.186 |

---

93 Values are presented as least square means  $\pm$  SEM. (n = 8 pigs per dietary treatment). <sup>a,b</sup> Different superscripts within a row indicate  
94 significant difference ( $P \leq 0.05$ ). COGs (Clusters of Orthologous Groups); Con, control; LA, lactic acid-treated cereals. Only Clusters of  
95 Orthologous Group functions within the carbohydrate metabolism that were significantly ( $P \leq 0.05$ ) or tended ( $P \leq 0.10$ ) to be different  
96 among treatments are presented.



97 **TABLE S8** Permutational multivariate analysis of variance (PERMANOVA) results for KEGG  
 98 orthology (KO) functions related to ‘carbohydrate metabolism’ (relative abundance > 0.01% of  
 99 all reads) in cecal digesta of pigs fed diets with or without phytase and lactic acid treatment of  
 100 cereals

| Source of Variation   | df | SS    | R <sup>2</sup> | F     | P-value |
|-----------------------|----|-------|----------------|-------|---------|
| Diet                  | 3  | 0.017 | 0.141          | 1.538 | 0.077   |
| Phytase               | 1  | 0.009 | 0.076          | 2.481 | 0.031   |
| Lactic acid           | 1  | 0.005 | 0.041          | 1.342 | 0.196   |
| Phytase : Lactic acid | 1  | 0.003 | 0.024          | 0.792 | 0.536   |
| Residual              | 28 | 0.104 | 0.859          |       |         |
| Total                 | 31 | 0.121 | 1.000          |       |         |

101 The analysis based on pairwise distance of a multivariate data set and values were obtained using  
 102 type III sums of squares with 999 permutations of residuals. Significant difference was declared  
 103 at  $P \leq 0.05$ . df, degrees of freedom; SS, sum of square.
